# Supplementary material for: Discovering protein drug targets using knowledge graph embeddings
Source: Oxford University Press journal article supplement (doi:10.1093/bioinformatics/btz600), 2019-07-27
Supplement: btz600_supplementary_data.pdf [file btz600_supplementary_data.pdf]

---

# Discovering Protein Drug Targets Using Knowledge Graph Embeddings

## SUPPLEMENTARY MATERIAL

---

Sameh K. Mohamed<sup>1 2 3</sup> Vít Nováček<sup>1 2 3</sup> Aayah Nounu<sup>4</sup>

### 1. Supporting Knowledge Graphs

Knowledge graph embeddings are known to provide state-of-the-art results in link prediction on knowledge graphs (NICKEL ET AL.; LACROIX ET AL. 2016a; 2018). They operate by learning low rank representations of knowledge graphs' entities and relation, then they use these representation to assess the factuality of relation associations between entities. They encode knowledge of different types of association for each entity and relation in its embeddings, then they can efficiently learn their unknown link.

In the task of drug target prediction, a knowledge graph embedding model can be efficiently trained to predict drug target associations between drug and target entities in a biological knowledge graph by learning efficient vector representations of both drugs and target in a knowledge graph context. Therefore, we train our knowledge graph embedding model, the TriModel model, on a knowledge graph that contains training drug target interactions along with other associations of drugs and targets as show in Table 1. For example, when training the TriModel model on the Yamanishi\_08 and our KEGG\_MED dataset (YAMANISHI ET AL. 2008), we include drug and target information from the KEGG (KANEHISA ET AL. 2017) and UniProt (CONSORTIUM 2017) knowledge bases. Information we include are for instance ATC codes of drugs, BRITE identifiers, classes, associated diseases, groups and associated pathways from the KEGG knowledge base. Similarly, we use the target's active sites, binding sites, conserved sites, domains, associated pathways, family, and protein-protein interactions and different gene ontology annotations from the UniProt (CONSORTIUM 2017) and InterPro (MITCHELL ET AL. 2019) databases.

For example, *Aspirin* has multiple ATC codes such as *B01AC06* and *C07FX04*. These codes are transformed

into assertions in the knowledge graph, where each code is transformed into five assertions as follows:

|                               |                           |
|-------------------------------|---------------------------|
| 1- (Aspirin, ATC-C1, B)       | Aspirin<br>ATC<br>B01AC6  |
| 2- (Aspirin, ATC-C2, B01)     |                           |
| 3- (Aspirin, ATC-C3, B01A)    |                           |
| 4- (Aspirin, ATC-C4, B01AC)   |                           |
| 5- (Aspirin, ATC-C5, B01AC6)  |                           |
| 1- (Aspirin, ATC-C1, C)       | Aspirin<br>ATC<br>C07FX04 |
| 2- (Aspirin, ATC-C2, C07)     |                           |
| 3- (Aspirin, ATC-C3, C07F)    |                           |
| 4- (Aspirin, ATC-C4, C07FX)   |                           |
| 5- (Aspirin, ATC-C5, C07FX04) |                           |

Similarly, the enzyme classes of protein enzymes are also transformed into four assertions. For example the LATS1 protein has enzyme class number *EC:2.7.11.1*, this is transformed into four assertions as follows:

|                                |                              |
|--------------------------------|------------------------------|
| 1- (LATS1, EC-C1, EC:2.7.11.1) | Aspirin<br>EC<br>EC:2.7.11.1 |
| 2- (LATS1, EC-C2, EC:2.7.11.1) |                              |
| 3- (LATS1, EC-C3, EC:2.7.11.1) |                              |
| 4- (LATS1, EC-C4, EC:2.7.11.1) |                              |

These generated assertions for both ATC and EC codes allow for grouping drugs and proteins with similar class levels by connecting them to the same nodes in the knowledge graph.

In the case of the DrugBank\_FDA benchmark dataset (WISHART ET AL. 2008), the TriModel model uses information about drugs and targets from both the UniProt (CONSORTIUM 2017) and DrugBank (WISHART ET AL.; WISHART ET AL. 2006; 2008) knowledge bases. We use drugs' ATC codes, categories, associated pathways and the categories of these pathways. We also use the same protein information as for the Yamanishi\_08 and KEGG\_MED datasets. Table 1 contains a summary and statistics of the relation instances of each knowledge base.

<sup>1</sup>Data Science Institute <sup>2</sup>National University of Ireland Galway  
<sup>3</sup>Insight Centre for Data Analytics <sup>4</sup>MRC Integrative Epidemiology Unit, University of Bristol. Correspondence to: Sameh K. Mohamed <sameh.kamal@insight-centre.org>.

| KEGG            |       | UniProt                |       | DrugBank         |       |
|-----------------|-------|------------------------|-------|------------------|-------|
| Relation        | Count | Relation               | Count | Relation         | Count |
| Drug ATC        | 902   | Protein active site    | 281   | Drug ATC         | 2541  |
| Drug BRITE      | 3354  | Protein binding site   | 153   | Drug Category    | 21041 |
| Drug Class      | 703   | Protein conserved site | 334   | Drug Pathway     | 2013  |
| Drug Disease    | 1696  | Protein domain         | 2204  | Pathway Category | 4670  |
| Drug Group      | 2714  | Protein Pathway        | 3189  |                  |       |
| Drug Pathway    | 1340  | Protein Family         | 1584  |                  |       |
| Protein BRITE   | 2572  | PPI                    | 7276  |                  |       |
| Protein Disease | 709   | Protein GO: M.F.       | 6958  |                  |       |
| Protein EC No.  | 753   | Protein GO: C.C.       | 7588  |                  |       |
| Protein Motif   | 4374  | Protein GO: B.P        | 17639 |                  |       |
| Protein Pathway | 5551  | Protein EC No.         | 840   |                  |       |

Table 1. Summary and statistics of a sample of relations extracted from supporting knowledge bases M.F, C.C and B.F refer to molecular function, cellular component and biological process respectively.

## 2. Model Training and Evaluation Pipeline

The TriModel model uses a standard knowledge graph embeddings training procedure that consumes a set of graph assertions and initial embeddings (NICKEL ET AL. 2016b). The outcome of the training procedure is the update version of the embeddings, where these embeddings are used to provide scores for any given set of assertions. Fig. 2 shows a diagram of the training evaluation procedure of the TriModel model on the drug target interactions data. First, the model combines both the training drug target interactions and their corresponding supporting knowledge graph assertions to model the input knowledge graph *i.e.* triplets. These assertions are fed to the model along with an initial values for the embeddings for all the entities and relations in the graph. The learning process (training) involves updating the initial embeddings such that the updates embeddings values provide efficient scoring for all the input assertions.

## 3. Partial Knowledge Assessment

In this section, we explore the importance of different parts of the supporting knowledge graphs and their effect of the outcome accuracy on the TriModel model. We have evaluated the TriModel model on the Yamanishi\_08 dataset while we remove parts of the supporting knowledge graphs for each group of drug target interactions. Our evaluation is performed in six configurations: (1) *none*: where the model do not use any supporting knowledge graph information during the training, (2) *C1*: the ATC codes of drugs are excluded (3) *C2*: the protein sequence related assertions such as motifs, domain, etc. (4) *C3*: the pathway related assertions for both drugs and proteins are excluded (5) *C4*: the disease related assertions are excluded. (6) *full*: the full

supporting knowledge graph is used.

Table 2 shows a summary of the outcome results of the evaluation of the previously mentioned configurations. The results show that excluding parts of the knowledge graph have an effect on the outcome accuracy of the model. The results show that the best predictive accuracy is achieved on two configurations: *full* and *C1*. The *full* configuration denotes the use of the full knowledge graph as a supporting evidence, while the *C1* configuration represents the knowledge graph without the information related to the ATC codes. On the other hand, the worst results are achieved with the *none* configuration, where no supporting knowledge graph is used.

## 4. Experiments Setup Configurations

We learn the best parameters for the TriModel model using the grid search described in the experimental setup section. Table 3 shows the best parameters found using the grid search for each parameter, where the grid search is performed only on the supporting knowledge graphs of each of the investigated datasets with no drug target interactions. The grid search is then assessed as a classical link prediction task on knowledge graphs. We report the runtime of the TriModel model per each cross-validation iteration for each of the investigated benchmarking datasets in Fig. 1.

## 5. Novel Drug Target Interactions

We generated all possible unknown drug target combination for each of the investigated datasets, and we have used the TriModel model to predict scores for these combination. We have then ranked these combinations according to the

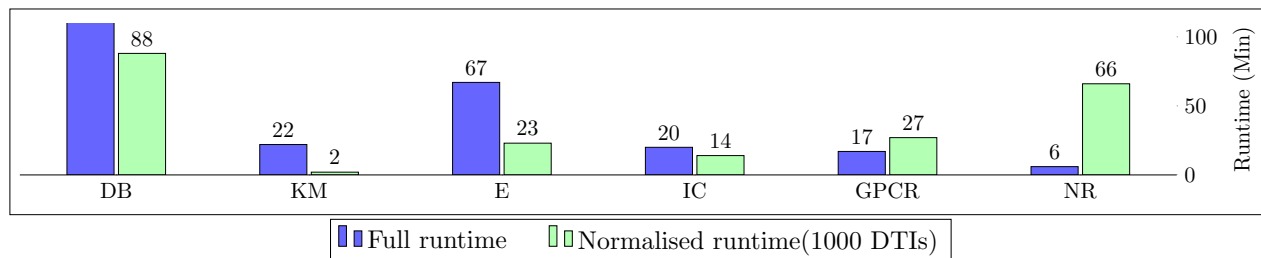

Figure 1. The runtime in minutes of the TriModel model for one cross-validation iteration (10-folds) on each of the investigated benchmarking datasets. The normalised runtime ( $t_n^d$ ) of the dataset  $d$  is computed such that  $t_n^d = t^d / N_d * 1000$ , where  $n^d$  is the full runtime on the dataset  $d$  and  $N_d$  is the number of DTIs instances in the  $d$  dataset. DB full runtime = 867 minutes.

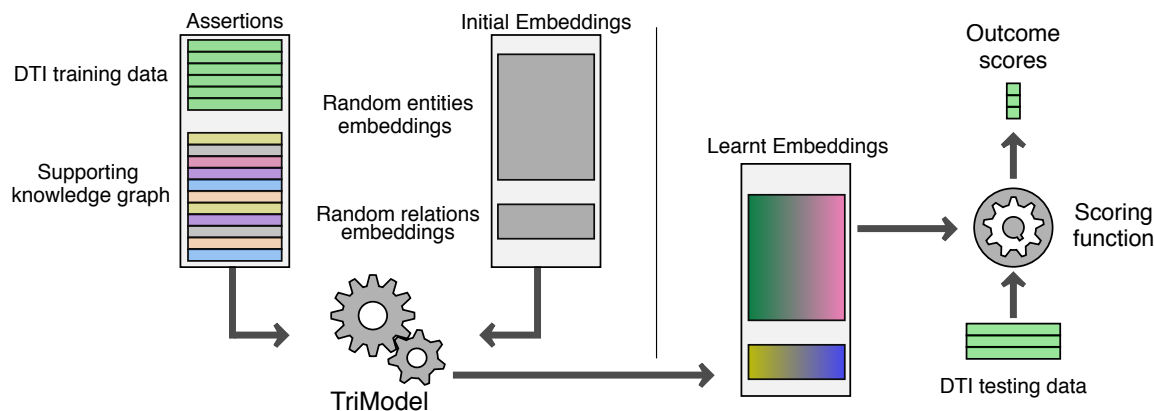

Figure 2. A diagram of the training pipeline of the TriModel model. Both drug target interactions and supporting knowledge graph assertions are combined and used as input to the model along with initial random embeddings for both entities and relations. The outcome of the training procedure is learnt embeddings which is used to score any drug target interaction data of drugs and proteins processed during the training processes.

| Model    | Config.     | Metric  | E           |             |             | IC          |             |             | GPCR        |             |             | NR          |             |             |
|----------|-------------|---------|-------------|-------------|-------------|-------------|-------------|-------------|-------------|-------------|-------------|-------------|-------------|-------------|
|          |             |         | Sd          | St          | Sp          |
| TriModel | None        | AUC-ROC | 0.83        | 0.89        | <b>0.99</b> | 0.86        | 0.92        | <b>0.99</b> | 0.71        | 0.68        | 0.97        | 0.68        | 0.72        | 0.94        |
|          | C1          |         | 0.94        | <b>0.96</b> | <b>0.99</b> | <b>0.93</b> | <b>0.98</b> | <b>0.99</b> | <b>0.92</b> | <b>0.89</b> | <b>0.99</b> | 0.86        | <b>0.85</b> | <b>0.99</b> |
|          | C2          |         | 0.94        | 0.95        | <b>0.99</b> | <b>0.93</b> | <b>0.98</b> | <b>0.99</b> | <b>0.92</b> | 0.85        | <b>0.99</b> | 0.87        | 0.83        | <b>0.99</b> |
|          | C3          |         | 0.92        | 0.94        | <b>0.99</b> | <b>0.93</b> | 0.96        | <b>0.99</b> | 0.91        | 0.80        | 0.98        | 0.83        | 0.70        | 0.96        |
|          | C4          |         | 0.93        | <b>0.96</b> | <b>0.99</b> | <b>0.93</b> | <b>0.98</b> | <b>0.99</b> | 0.91        | 0.88        | <b>0.99</b> | 0.85        | 0.84        | <b>0.99</b> |
|          | Full        |         | <b>0.95</b> | <b>0.96</b> | <b>0.99</b> | <b>0.93</b> | <b>0.98</b> | <b>0.99</b> | <b>0.92</b> | 0.86        | <b>0.99</b> | <b>0.89</b> | <b>0.85</b> | <b>0.99</b> |
|          | None        | AUC-PR  | 0.27        | 0.30        | 0.94        | 0.32        | 0.53        | 0.93        | 0.26        | 0.38        | 0.79        | 0.46        | 0.61        | 0.69        |
|          | C1          |         | 0.75        | <b>0.83</b> | 0.95        | 0.76        | <b>0.89</b> | <b>0.95</b> | 0.79        | <b>0.75</b> | <b>0.81</b> | 0.84        | <b>0.78</b> | <b>0.84</b> |
|          | C2          |         | 0.76        | 0.82        | 0.95        | <b>0.79</b> | 0.83        | 0.94        | <b>0.81</b> | 0.66        | 0.80        | <b>0.87</b> | 0.70        | 0.74        |
|          | C3          |         | 0.73        | 0.79        | 0.95        | 0.74        | 0.84        | <b>0.95</b> | 0.78        | 0.60        | 0.79        | 0.81        | 0.64        | 0.72        |
| C4       | 0.73        |         | <b>0.83</b> | 0.95        | 0.77        | 0.87        | <b>0.95</b> | 0.78        | 0.72        | 0.80        | 0.83        | 0.69        | 0.79        |             |
| Full     | <b>0.78</b> |         | <b>0.83</b> | <b>0.96</b> | 0.76        | 0.87        | <b>0.95</b> | <b>0.81</b> | 0.73        | 0.80        | <b>0.87</b> | 0.77        | <b>0.84</b> |             |

Table 2. Summary of evaluation results for experimenting the TriModel model on different benchmarking datasets with different excluded subsets of the supporting knowledge graph. The experiments have six different configurations: (1) None: where no supporting knowledge graphs are used (2) C1: excluded the ATC codes for drugs (3) C2: excluded protein sequence related assertions (4) C3: excluded pathway related assertions for both drugs and proteins (5) C4: excluded disease related assertions. (6) Full: using the full supporting knowledge graph.

## Discovering Protein Drug Targets Using Knowledge Graph Embeddings

| Dataset                            | Best parameters |        |         |                |               |
|------------------------------------|-----------------|--------|---------|----------------|---------------|
|                                    | Batch size      | Lambda | Dropout | Embedding size | Learning rate |
| Enzymes (E)                        | 4000            | 0.03   | 0.2     | 150            | 0.01          |
| Ion Channels (IC)                  | 512             | 0.03   | 0.2     | 150            | 0.01          |
| G-Protein Coupled Receptors (GPCR) | 256             | 0.03   | 0.2     | 150            | 0.01          |
| Nuclear Receptors (NR)             | 128             | 0.03   | 0.2     | 150            | 0.01          |
| DrugBank_FDA (DB)                  | 4000            | 0.3    | 0.2     | 200            | 0.01          |
| KEGG_MEDICUS (KM)                  | 4000            | 0.3    | 0.2     | 200            | 0.01          |

Table 3. The best parameters of the TriModel model on each of the investigated benchmarking datasets.

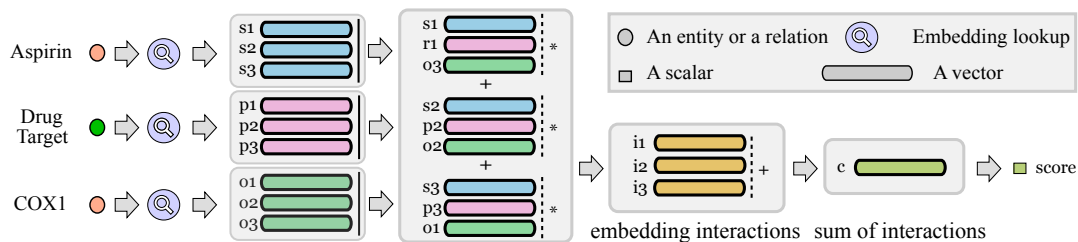

Figure 3. Flow diagram of the scoring function of TriModel. The subject, the relation, and the object are represented using three embedding vectors of size  $k$ . The score of a triple  $(s, p, o)$  is defined as  $f(s, p, o) = \sum_k c_k$ , where  $c = i1 + i2 + i3$ ,  $i1 = s1 \cdot r1 \cdot o3$ ,  $i2 = s2 \cdot r2 \cdot o2$ , and  $i3 = s3 \cdot r3 \cdot o1$ .

predicted scores and used the top 10 scored combinations of each datasets to assess the model’s capabilities for predicting unknown drug target interactions. A domain expert annotated each of the top 10 combinations with three labels *YES*, *NO* and *UNKNOWN* which represent known valid drug target interactions, proven invalid drug target interactions and unknown interactions, respectively. Table 4 presents the top 10 predictions for each dataset along with the expert annotation and literature evidence (via PubMed ID).

## Discovering Protein Drug Targets Using Knowledge Graph Embeddings

| Dataset | #  | Drug Name                      | Drug Id | Target Name | Target ID | Score | Valid   | Evidence         |
|---------|----|--------------------------------|---------|-------------|-----------|-------|---------|------------------|
| E       | 1  | Halothane                      | D00542  | CYP2E1      | hsa:1571  | 8.820 | YES     | PubMed:19442086  |
|         | 2  | Aminocaproic acid              | D00160  | PROC        | hsa:5624  | 8.601 | Unknown | -                |
|         | 3  | Imatinib mesylate              | D01441  | MAPK1       | hsa:5594  | 8.355 | YES     | PubMed: 22089930 |
|         | 4  | Methoxsalen                    | D00139  | CYP1A1      | hsa:1543  | 8.323 | YES     | PubMed: 7702611  |
|         | 5  | Isoflurophate                  | D00043  | ELANE       | hsa:1991  | 8.311 | Unknown | -                |
|         | 6  | Imatinib mesylate              | D01441  | MAPK3       | hsa:5595  | 8.295 | YES     | PubMed: 15100154 |
|         | 7  | Metyrapone                     | D00410  | CYP1A1      | hsa:1543  | 8.275 | YES     | PubMed: 9512490  |
|         | 8  | Salicylic acid                 | D00097  | PTGS2       | hsa:5743  | 8.184 | No      | -                |
|         | 9  | Nifedipine                     | D00437  | CYP2C9      | hsa:1559  | 8.140 | YES     | PubMed: 9929518  |
|         | 10 | Aminoglutethimide              | D00574  | CYP21A2     | hsa:1589  | 8.132 | YES     | PubMed: 8201961  |
| IC      | 1  | Nicotine                       | D03365  | CHRNA4      | hsa:1137  | 6.486 | YES     | PubMed:17590520  |
|         | 2  | Zonisamide                     | D00538  | SCN5A       | hsa:6331  | 6.468 | YES     | PubMed:20025128  |
|         | 3  | Benzocaine                     | D00552  | SCN5A       | hsa:6331  | 6.380 | YES     | PubMed:19661462  |
|         | 4  | Nimodipine                     | D00438  | CACNA1S     | hsa:779   | 6.297 | YES     | PubMed:16675661  |
|         | 5  | Metoclopramide                 | D00726  | CHRNA5      | hsa:1138  | 6.285 | Unknown | -                |
|         | 6  | Isoflurane                     | D00545  | GLRA2       | hsa:2742  | 6.262 | Unknown | -                |
|         | 7  | Diazoxide                      | D00294  | ABCC9       | hsa:10060 | 6.198 | YES     | PubMed: 21428460 |
|         | 8  | Prilocaine                     | D00553  | SCN10A      | hsa:6336  | 5.992 | YES     | PubMed:17139284  |
|         | 9  | Verapamil hydrochloride        | D00619  | CACNA1F     | hsa:778   | 5.961 | YES     | PubMed:19125880  |
|         | 10 | Nimodipine                     | D00438  | CACNA2D1    | hsa:781   | 5.940 | Unknown | PubMed: 29176626 |
| GPCR    | 1  | Isoetharine                    | D04625  | ADRB2       | hsa:154   | 7.148 | YES     | PubMed:21948594  |
|         | 2  | Octreotide acetate             | D02250  | SSTR1       | hsa:6751  | 6.752 | YES     | PubMed:16438887  |
|         | 3  | Clonidine hydrochloride        | D00604  | ADRA1B      | hsa:147   | 6.650 | YES     | PubMed: 17584443 |
|         | 4  | Metoprolol                     | D02358  | ADRB2       | hsa:154   | 6.499 | YES     | PubMed:19637941  |
|         | 5  | Epinephrine                    | D00095  | ADRA1D      | hsa:146   | 6.489 | YES     | PubMed:20954794  |
|         | 6  | Theophylline                   | D00371  | ADORA2A     | hsa:135   | 6.407 | YES     | PubMed:16357952  |
|         | 7  | Denopamine                     | D02614  | ADRB2       | hsa:154   | 6.388 | NO      | PubMed: 22505670 |
|         | 8  | Risperidone                    | D00426  | DRD2        | hsa:1813  | 6.386 | YES     | PubMed:17059881] |
|         | 9  | Bosentan                       | D01227  | AGTR1       | hsa:185   | 6.347 | Unknown | -                |
|         | 10 | Epinephrine                    | D00095  | ADRA1B      | hsa:147   | 6.306 | YES     | PubMed:20954794  |
| NR      | 1  | Medroxyprogesterone acetate    | D00951  | ESR1        | hsa:2099  | 6.314 | YES     | PubMed:17094978  |
|         | 2  | Mometasone furoate             | D00690  | NR3C1       | hsa:2908  | 6.066 | YES     | PubMed:8439518   |
|         | 3  | Ethinyl estradiol              | D00554  | ESR2        | hsa:2100  | 6.038 | NO      | PubMed: 15878629 |
|         | 4  | Dydrogesterone                 | D01217  | ESR1        | hsa:2099  | 5.968 | YES     | PubMed: 22878119 |
|         | 5  | Norethindrone                  | D00182  | ESR1        | hsa:2099  | 5.893 | YES     | PubMed: 27245768 |
|         | 6  | Etretinate                     | D00316  | RORB        | hsa:6096  | 5.848 | Unknown | -                |
|         | 7  | Mifepristone                   | D00585  | ESR1        | hsa:2099  | 5.841 | YES     | PubMed: 15001543 |
|         | 8  | Tretinoin                      | D00094  | RORA        | hsa:6095  | 5.679 | YES     | CheMBL           |
|         | 9  | Tazarotene                     | D01132  | RORC        | hsa:6097  | 5.463 | Unknown | -                |
|         | 10 | Testosterone                   | D00075  | ESR1        | hsa:2099  | 5.453 | YES     | PubMed:12676605  |
| DB      | 1  | Methysergide                   | DB00247 | HTR1D       | P28221    | 6.421 | YES     | PubMed: 7984267  |
|         | 2  | Phenoxymethylpenicillin        | DB00417 | SLC15A2     | Q16348    | 6.295 | Unknown | -                |
|         | 3  | L-Valine                       | DB00161 | BCAT2       | O15382    | 6.263 | YES     | PubMed: 6933702  |
|         | 4  | Corticotrelin ovine triflutate | DB09067 | GHRHR       | Q02643    | 6.237 | Unknown | -                |
|         | 5  | Acarbose                       | DB00284 | GANC        | Q8TET4    | 6.232 | YES     | KEGG             |
|         | 6  | Halothane                      | DB01159 | GRIA1       | P42261    | 6.226 | YES     | PubMed: 14739810 |
|         | 7  | Hydroxocobalamin               | DB00200 | GIF         | P27352    | 6.226 | Unknown | -                |
|         | 8  | Quazepam                       | DB01589 | GABRB2      | P47870    | 6.215 | YES     | PubMed:6738302   |
|         | 9  | Nintedanib                     | DB09079 | KIT         | P10721    | 6.202 | Unknown | -                |
|         | 10 | Miglitol                       | DB00491 | SI          | P14410    | 6.201 | YES     | CheMBL           |

Table 4. Validation of the top 10 scored combination for each of the investigated datasets. The DrugBank, CheMBL and KEGG DTIs are used as evidence the different interactions, where the PubMed ID is listed when possible.

## References

- Consortium, The UniProt. Uniprot: the universal protein knowledgebase. In *Nucleic Acids Research*, 2017.
- Kanehisa, Minoru, Furumichi, Miho, Tanabe, Mao, Sato, Yoko, and Morishima, Kanae. Kegg: new perspectives on genomes, pathways, diseases and drugs. *Nucleic Acids Research*, 45(D1):D353–D361, 2017.
- Lacroix, Timothée, Usunier, Nicolas, and Obozinski, Guillaume. Canonical tensor decomposition for knowledge base completion. In *ICML*, volume 80 of *JMLR Workshop and Conference Proceedings*, pp. 2869–2878. JMLR.org, 2018.
- Mitchell, Alex L, Attwood, Teresa K, Babbitt, Patricia C, Blum, Matthias, Bork, Peer, Bridge, Alan, Brown, Shoshana D, Chang, Hsin-Yu, El-Gebali, Sara, Fraser, Matthew I, Gough, Julian, Haft, David R, Huang, Hongzhan, Letunic, Ivica, Lopez, Rodrigo, Luciani, Aurlien, Madeira, Fabio, Marchler-Bauer, Aron, Mi, Huaiyu, Natale, Darren A, Necci, Marco, Nuka, Gift, and et. al. Interpro in 2019: improving coverage, classification and access to protein sequence annotations. *Nucleic Acids Research*, 47(D1):D351–D360, 2019.
- Nickel, Maximilian, Murphy, Kevin, Tresp, Volker, and Gabrilovich, Evgeniy. A review of relational machine learning for knowledge graphs. *Proceedings of the IEEE*, 104(1):11–33, 2016a.
- Nickel, Maximilian, Murphy, Kevin, Tresp, Volker, and Gabrilovich, Evgeniy. A review of relational machine learning for knowledge graphs. *Proceedings of the IEEE*, 104(1):11–33, 2016b.
- Wishart, David S., Knox, Craig, Guo, An Chi, Shrivastava, Savita, Hassanali, Murtaza, Stothard, Paul, Chang, Zhan, and Woolsey, Jennifer. Drugbank: a comprehensive resource for in silico drug discovery and exploration. *Nucleic Acids Research*, 34:D668–D672, 2006.
- Wishart, David S., Knox, Craig, Guo, An Chi, Cheng, Dean, Shrivastava, Savita, Tzur, Dan, Gautam, Bijaya, and Hassanali, Murtaza. Drugbank: a knowledgebase for drugs, drug actions and drug targets. *Nucleic Acids Research*, 36:D901–D906, 2008.
- Yamanishi, Yoshihiro, Araki, Michihiro, Gutteridge, Alex, Honda, Wataru, and Kanehisa, Minoru. Prediction of drug–target interaction networks from the integration of chemical and genomic spaces. *Bioinformatics*, 24(13): i232–i240, 2008.
